# Supplementary material for: The Utility of Bedside Assessment Tools and Associated Factors to Avoid Antibiotic Overuse in an Urban PICU of a Diarrheal Disease Hospital in Bangladesh
Source: MDPI journal article supplement (doi:10.3390/antibiotics10101255), 2021-10-15
Supplement: s1 [file s1]

## **S1 File. Pediatric Intensive Care Unit admission criteria**

**Admit to ICU if has any 1 major or 3 minor criteria:**

### **Major**

- Severe sepsis/ Septic Shock
- Requires respiratory support:
  - Invasive: (mechanical ventilation in respiratory failure)
  - Non-invasive: (bubble CPAP in hypoxemia and grunting respiration)
- Convulsion/Disorientation/Coma
- Hypothermia  $<35.5^{\circ}$  Celsius
- Hypoglycemia ( $\geq 2$  times)

### **Minor**

- SAM or WAZ score  $< -4$
- Restlessness/Lethargy
- Hyperthermia  $\geq 40^{\circ}$  Celsius (core temperature)
- Moderate to severe neutropenia (moderate  $< 1.0$  to  $\geq 0.5 \times 10^9/L$ ; severe  $< 0.5 \times 10^9/L$ )
- Thrombocytopenia  $< 100,000$
